# Supplementary material
Source: Research Square preprint supplement (doi:10.21203/rs.3.rs-8838504/v1)
Supplement: Supplementary file 1 [file 5239acb259c47a5e32fc05e6.docx]

Supporting information

Spatial-Temporal Variations of Multi-Media Pollutants (Noise-Air-Water) in Three Representative Cement Plants and Their Comprehensive Environmental Risk Assessment

Shuai Li1[[1]](#footnote-0)*, Jie Jiang1, Xin Li1, Guanhou Chen1, Bin Li1,Rong Wang1,Limei Luo1

**1.Xipu Technology (Chengdu) Co., Ltd., Chengdu, Sichuan 61000, China**

Table S1 The hazard quotient (HQ) and hazard index (HI) of different atmospheric pollutants from three cement plants

| Group/HQ | TSP  (mg/m3) | NH3 (mg/m3) | H2S (mg/m3) | Odor concentration (mg/m3) | PM (mg/m3) | SO2 (mg/m3) | NOX (mg/m3) | Fluoride (mg/m3) | PCDDs (TEQ/m3) | HI |
| --- | --- | --- | --- | --- | --- | --- | --- | --- | --- | --- |
| BC1 | 0.557 | 0.490 | 0.050 | 0.400 | 0.560 | 0.039 | 0.827 | 0.092 | 0.048 | 3.063 |
| BC2 | 0.494 | 0.223 | 0.061 | 0.650 | 0.497 | 0.040 | 0.697 | 0.011 | 0.132 | 2.804 |
| NC1 | 0.238 | 0.140 | 0.027 | 0.353 | 0.450 | 0.038 | 0.447 | 0.010 | 0.035 | 1.738 |
| NC2 | 0.262 | 0.197 | 0.052 | 0.458 | 0.387 | 0.041 | 0.567 | 0.035 | 0.050 | 2.049 |
| ZL1 | 0.263 | 0.060 | 0.042 | 0.400 | 0.680 | 0.219 | 0.223 | 0.011 | 0.042 | 1.940 |
| ZL2 | 0.269 | 0.260 | 0.061 | 0.650 | 0.480 | 0.133 | 0.517 | 0.274 | 0.045 | 2.689 |

Table S2 The Risk quotient (RQ) of different wastewater pollutants from three cement plants

| Group/RQ | COD | BOD5 | NH3-N | TP | SS | Cr | Pb | As | Hg | Cd |
| --- | --- | --- | --- | --- | --- | --- | --- | --- | --- | --- |
| BC1 | 0.100 | 0.066 | 0.275 | 0.158 | 0.160 | 0.500 | 0.390 | 0.007 | 0.079 | 0.327 |
| BC2 | 0.102 | 0.086 | 0.408 | 0.213 | 0.103 | 0.097 | 0.031 | 0.005 | 0.069 | 0.280 |
| NC1 | 0.027 | 0.016 | 0.137 | 0.100 | 0.093 | 0.042 | 0.079 | 0.004 | 0.046 | 0.234 |
| NC2 | 0.093 | 0.054 | 0.080 | 0.583 | 0.147 | 0.055 | 0.153 | 0.004 | 0.056 | 0.353 |
| ZL1 | 0.117 | 0.071 | 0.086 | 1.310 | 0.090 | 0.045 | 0.127 | 0.004 | 0.047 | 0.233 |
| ZL2 | 0.127 | 0.077 | 0.090 | 1.500 | 0.093 | 0.057 | 0.160 | 0.005 | 0.045 | 0.220 |

1. * Corresponding author.Shuai Li

   Tel.:13402874270

   E-mail address: 750331351@qq.com [↑](#footnote-ref-0)
